# Supplementary material for: Scientific Literature Database Coverage of Randomized Clinical Trials for Central Serous Chorioretinopathy
Source: MDPI journal article supplement (doi:10.3390/jpm13060983), 2023-06-12
Supplement: s1 [file s1]

**Supplementary File S1.** Documentation of the search in the individual databases.

**BIOSIS Previews:**

[Advanced Search](#) > Results for TS=("central serous chorioretinopathy" AND (randomized OR ra...

**80 results from BIOSIS Previews for:**

🔍 TS=("central serous chorioretinopathy" AND (randomized OR randomised))

CINAHL:

Search History/Alerts

[Print Search History](#)   [Retrieve Searches](#)   [Retrieve Alerts](#)   [Save Searches / Alerts](#)

☐ Select / deselect all

Search with AND

Search with OR

Delete Searches

Refresh Search Results

| <a href="#">Search ID#</a> ▼ | Search Terms                                                                                                                                        | Search Options                                                                       | Actions                                                                                                             |                                                                                                                  |                                                                                                          |
|------------------------------|-----------------------------------------------------------------------------------------------------------------------------------------------------|--------------------------------------------------------------------------------------|---------------------------------------------------------------------------------------------------------------------|------------------------------------------------------------------------------------------------------------------|----------------------------------------------------------------------------------------------------------|
| <input type="checkbox"/> S1  |  "central serous chorioretinopathy" AND (randomized OR randomised) | <b>Expanders</b> - Apply equivalent subjects<br><b>Search modes</b> - Boolean/Phrase |  <a href="#">View Results</a> (26) |  <a href="#">View Details</a> |  <a href="#">Edit</a> |

## Cochrane Central:

**141** Trials matching "**central serous chorioretinopathy**" AND (randomized OR randomised) in Title Abstract  
**Keyword - (Word variations have been searched)**

[Cochrane Central Register of Controlled Trials](#)

Issue 4 of 12, April 2023

**Current Contents Connect:**

[Advanced Search](#) > Results for TS=("central serous chorioretinopathy" AND (randomized OR ra...

**97 results from Current Contents Connect for:**

 TS=("central serous chorioretinopathy" AND (randomized OR randomised))

Data Citation Index:

Search in: **Data Citation Index** ▾ Editions: **All** ▾

**Your search found no results**

Check the spelling and/or broaden your search parameters

☐ 0/1

Combine Sets ▾

Export ▾

☐ 1

TS=("central serous chorioretinopathy" AND (randomized OR randomised))

0

Derwent Innovations Index:

Search in: **Derwent Innovations Index** ▾

**Your search found no results**

Check the spelling and/or broaden your search parameters

☐ 0/1

Combine Sets ▾

Export ▾

☐ 1

TS=("central serous chorioretinopathy" AND (randomized OR randomised))

0

EMBASE:

▼ Search History (1)

View Saved

| <input type="checkbox"/> | # ▲ | Searches                                                                                                                                                                                                                                                                       | Results | Type     | Actions                                                | Annotations |
|--------------------------|-----|--------------------------------------------------------------------------------------------------------------------------------------------------------------------------------------------------------------------------------------------------------------------------------|---------|----------|--------------------------------------------------------|-------------|
| <input type="checkbox"/> | 1   | ("central serous chorioretinopathy" and (randomized or randomised)).mp.<br>[mp=title, abstract, heading word, drug trade name, original title, device manufacturer, drug manufacturer, device trade name, keyword heading word, floating subheading word, candidate term word] | 184     | Advanced | <a href="#">Display Results</a> <a href="#">More</a> ▼ |             |

Save

Remove

Combine with:

AND

OR

## KCI-Korean Journal Database:

[Advanced Search](#) > Results for TS=("central serous chorioretinopathy" AND (randomized OR ra...

### 4 results from KCI-Korean Journal Database for:

🔍 TS=("central serous chorioretinopathy" AND (randomized OR randomised))



## MEDLINE:

[Advanced Search](#) > Results for TS={"central serous chorioretinopathy" AND (randomized OR ra...

**102 results from MEDLINE® for:**

Q TS={"central serous chorioretinopathy" AND (randomized OR randomised))

PubMed:

# History and Search Details

| Search | Actions | Details | Query                                                                                                                                                                                                                                                                                                                                                                                                                                                                                                                                                                                                                                                                                                                                                                                                                                                                                                                                                                                                                                                                                                                                                                                                                                                                  | Results             | Time     |
|--------|---------|---------|------------------------------------------------------------------------------------------------------------------------------------------------------------------------------------------------------------------------------------------------------------------------------------------------------------------------------------------------------------------------------------------------------------------------------------------------------------------------------------------------------------------------------------------------------------------------------------------------------------------------------------------------------------------------------------------------------------------------------------------------------------------------------------------------------------------------------------------------------------------------------------------------------------------------------------------------------------------------------------------------------------------------------------------------------------------------------------------------------------------------------------------------------------------------------------------------------------------------------------------------------------------------|---------------------|----------|
| #1     |         |         | Search: " <b>central serous chorioretinopathy</b> " AND ( <b>randomized OR randomised</b> ) Sort by: <b>Most Recent</b><br>"central serous chorioretinopathy"[All Fields] AND ("random allocation"[MeSH Terms] OR ("random"[All Fields] AND "allocation"[All Fields]) OR "random allocation"[All Fields] OR "randomization"[All Fields] OR "randomized"[All Fields] OR "random"[All Fields] OR "randomisation"[All Fields] OR "randomisations"[All Fields] OR "randomise"[All Fields] OR "randomised"[All Fields] OR "randomising"[All Fields] OR "randomizations"[All Fields] OR "randomize"[All Fields] OR "randomizes"[All Fields] OR "randomizing"[All Fields] OR "randomness"[All Fields] OR "randoms"[All Fields] OR ("random allocation"[MeSH Terms] OR ("random"[All Fields] AND "allocation"[All Fields]) OR "random allocation"[All Fields] OR "randomization"[All Fields] OR "randomized"[All Fields] OR "random"[All Fields] OR "randomisation"[All Fields] OR "randomisations"[All Fields] OR "randomise"[All Fields] OR "randomised"[All Fields] OR "randomising"[All Fields] OR "randomizations"[All Fields] OR "randomize"[All Fields] OR "randomizes"[All Fields] OR "randomizing"[All Fields] OR "randomness"[All Fields] OR "randoms"[All Fields])) | <a href="#">138</a> | 14:50:15 |

| Search | Actions | Details | Query                                                                                                                                                                                                                                                                                                                                                                                                                                                                                                                                                                                                                                                                                                                                                                                                                                                                                                                                                                                                                                                                                                                                                            | Results | Time |
|--------|---------|---------|------------------------------------------------------------------------------------------------------------------------------------------------------------------------------------------------------------------------------------------------------------------------------------------------------------------------------------------------------------------------------------------------------------------------------------------------------------------------------------------------------------------------------------------------------------------------------------------------------------------------------------------------------------------------------------------------------------------------------------------------------------------------------------------------------------------------------------------------------------------------------------------------------------------------------------------------------------------------------------------------------------------------------------------------------------------------------------------------------------------------------------------------------------------|---------|------|
|        |         |         | <p><b>Translations</b></p> <p><b>randomized:</b> "random allocation"[MeSH Terms] OR ("random"[All Fields] AND "allocation"[All Fields]) OR "random allocation"[All Fields] OR "randomization"[All Fields] OR "randomized"[All Fields] OR "random"[All Fields] OR "randomisation"[All Fields] OR "randomisations"[All Fields] OR "randomise"[All Fields] OR "randomised"[All Fields] OR "randomising"[All Fields] OR "randomizations"[All Fields] OR "randomize"[All Fields] OR "randomizes"[All Fields] OR "randomizing"[All Fields] OR "randomness"[All Fields] OR "randoms"[All Fields]</p> <p><b>randomised:</b> "random allocation"[MeSH Terms] OR ("random"[All Fields] AND "allocation"[All Fields]) OR "random allocation"[All Fields] OR "randomization"[All Fields] OR "randomized"[All Fields] OR "random"[All Fields] OR "randomisation"[All Fields] OR "randomisations"[All Fields] OR "randomise"[All Fields] OR "randomised"[All Fields] OR "randomising"[All Fields] OR "randomizations"[All Fields] OR "randomize"[All Fields] OR "randomizes"[All Fields] OR "randomizing"[All Fields] OR "randomness"[All Fields] OR "randoms"[All Fields]</p> |         |      |

Showing 1 to 1 of 1 entries

## SciELO Citation Index:

[Advanced Search](#) > Results for TS=("central serous chorioretinopathy" AND (randomized OR ra...

### 2 results from SciELO Citation Index for:

Q TS=("central serous chorioretinopathy" AND (randomized OR randomised))

## Web of Science Core Collection:

[Advanced Search](#) > Results for TS=("central serous chorioretinopathy" AND (randomized OR ra...

**126 results from Web of Science Core Collection for:**

🔍 TS=("central serous chorioretinopathy" AND (randomized OR randomised))
